# Supplementary material for: Targeted exon skipping with AAV-mediated split adenine base editors
Source: PubMed Central journal article supplement (PMC6796986; doi:10.1038/s41421-019-0109-7), 2019-08-20
Supplement: 41421_2019_109_MOESM1_ESM.pdf [file 41421_2019_109_MOESM1_ESM.pdf]

## Supplementary Fig. S1

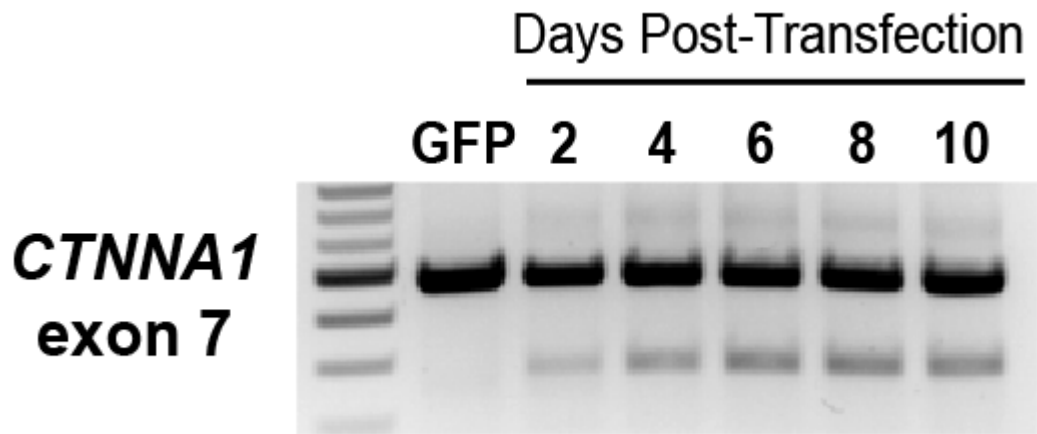

**Supplementary Fig. S1:** RT-PCR was used to detect exon skipping over a 10 day time course. Maximal levels of skipping were observed 6 days post-transfection.

## Supplementary Fig. S2

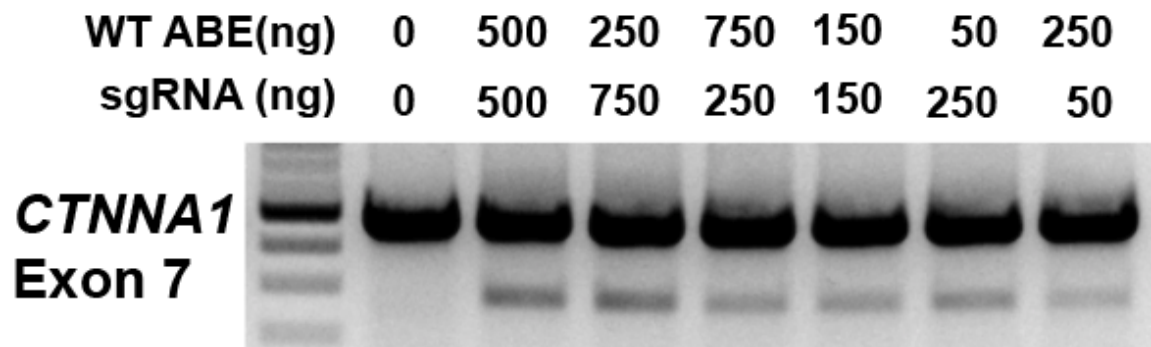

**Supplementary Fig. S2:** RT-PCR following transfection of HEK293T cells with various concentrations of plasmids encoding ABE and a sgRNA targeting exon 7 of the *CTNNA1* gene.

## Supplementary Fig. S3

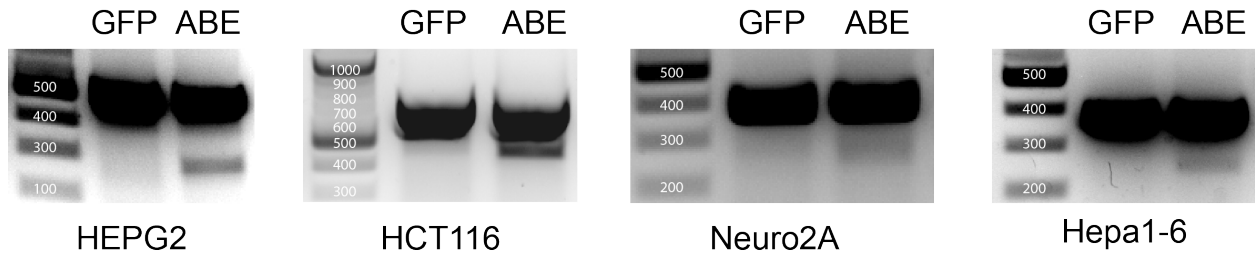

**Supplementary Fig. S3:** RT-PCR products demonstrating targeted exon skipping of *CTNNA1* exon 7 in HEPG2 cells, *AHCY* exon 9 in HCT116 cells, and *CTNNB1* in mouse Neuro2A and mouse Hepa1-6 cells. PCR primers and expected amplicon sizes are listed in **Supplementary Table S5**.

# Supplementary Fig. S4

## Target 1

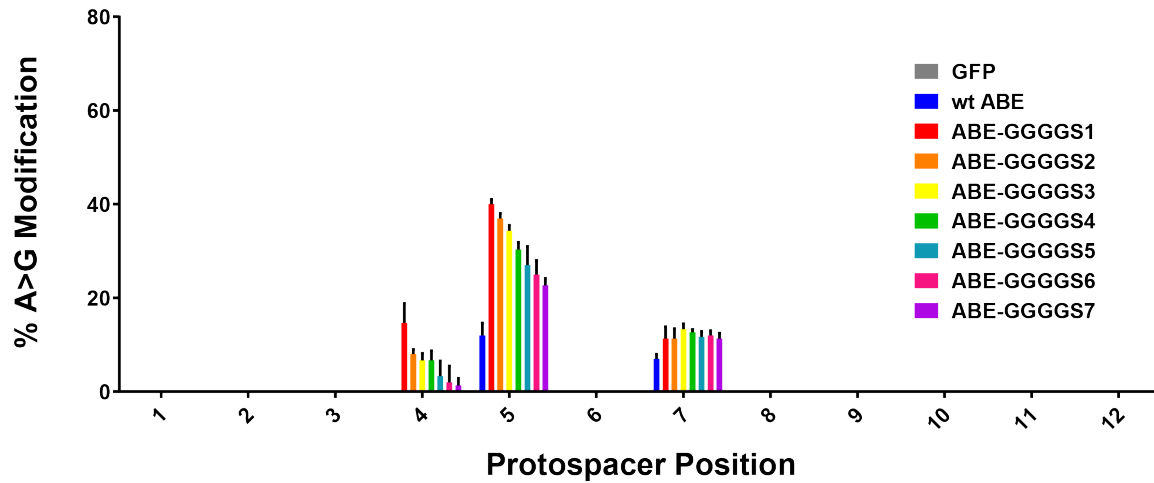

## Target 2

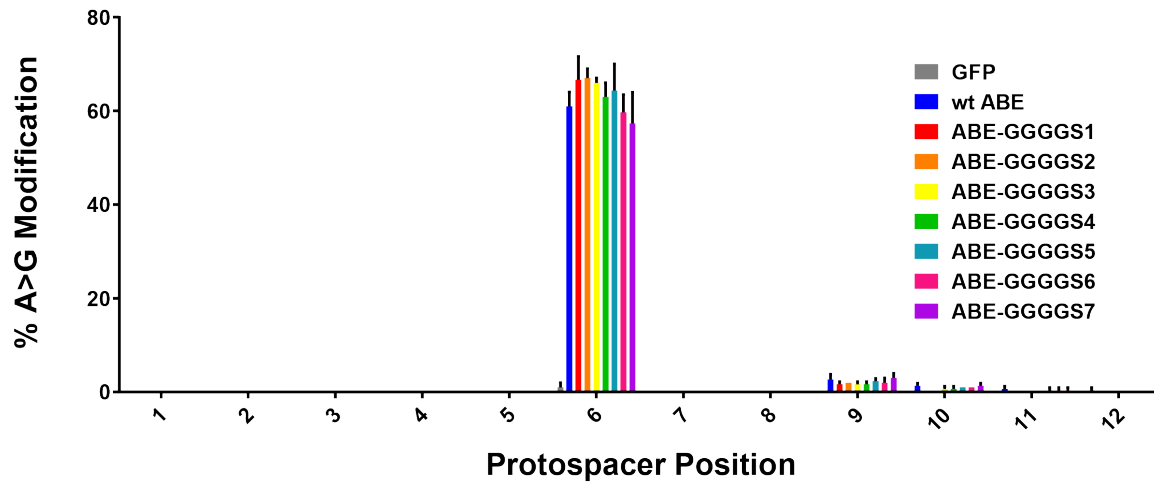

**Supplementary Fig. S4:** Estimates of positional A>G modification efficiencies at each of the target A's within the protospacer of A-Rich Target 1 and A-Rich Target 2 using EditR software (n = 3). Position 1 represents the base farthest from the start of the PAM using a 20bp sgRNA. ABE-GGGGS constructs enabled editing of position 4, which was not observed with *wt* ABE. Additionally, shorter linker lengths corresponded to higher editing rates for positions 4 and 5, with ABE-GGGGS1 achieving the highest rates of base editing.

## Supplementary Fig. S5

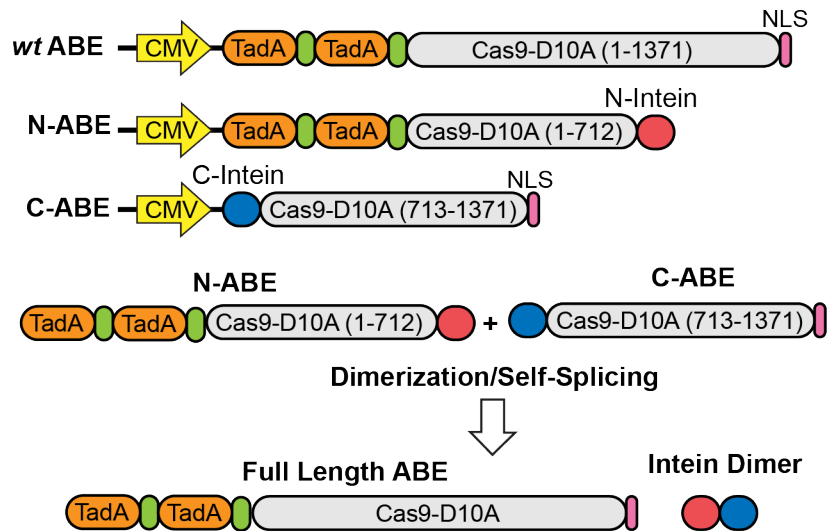

**Supplementary Fig. S5:** Schematic representation of the split-ABE plasmid system. N-terminal and C-terminal intein sequences reconstitute the full-length protein when co-expressed within the cell.

## Supplementary Fig. S6

|        |   |   |   |   |   |
|--------|---|---|---|---|---|
| GFP    | + | - | - | - | - |
| sgRNA  | - | + | + | + | + |
| wt ABE | - | + | - | - | - |
| N-ABE  | - | - | + | - | + |
| C-ABE  | - | - | - | + | + |

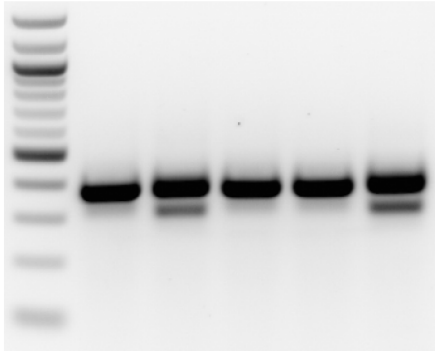

**Supplementary Fig. S6:** HEK293T cells were transfected with either GFP or a combination of sgRNA targeting AHCY exon 9 and N-ABE, C-ABE or both and their RNA was used in RT-PCR to detect targeted exon skipping of *HSF1* exon 11. Only when both split ABE plasmids are present we were able to detect exon skipping.

## Supplementary Fig. S7

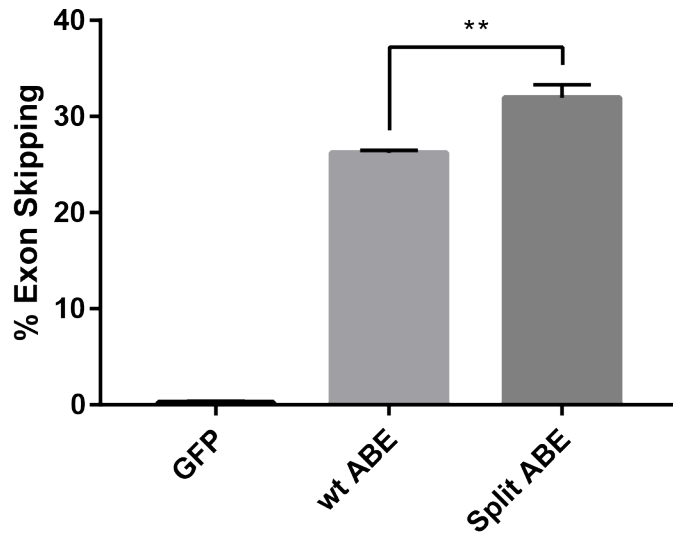

**Supplementary Fig. S7:** High throughput sequencing analysis of RT-PCR products demonstrated significantly increased levels of exon skipping by the split ABE system at 32.0% compared to 26.2% with the full length *wt* ABE ( $P = .002$  by two-tailed unpaired Students t-test ( $n = 3$ )).

## Supplementary Fig. S8

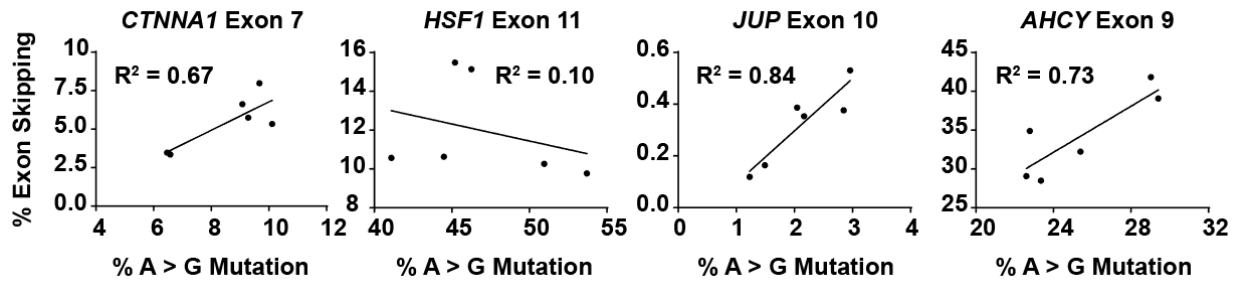

**Supplementary Fig. S8:** Rates of exon skipping showed a linear co-relation with rates of A>G mutations within splice acceptor sites for most targets tested.







| Target        | Sequence (5' to 3')  | PAM | On-Target Score | % Indels |
|---------------|----------------------|-----|-----------------|----------|
| CTNNA1 Exon 7 | CTGCAGAAACAAATCATTG  | TGG | 65.5            | 8.49     |
| HSF1 Exon 11  | TCCGCAGCTGTTCAGCCCCT | TGG | 44.1            | 16.48    |
| JUP Exon 10   | ACACAGGATGGTGTGAGGA  | CGG | 52.5            | 33.85    |
| AHCY Exon 9   | GCGTGTAGGTGGACCGGTAT | CGG | 43.9            | 11.47    |

**Supplementary Table S3:** Predicted on-target activity for each sgRNA<sup>2</sup> and observed %indels from HTS of genomic DNA following transfection with plasmids encoding *wt* Cas9 and the corresponding sgRNA.

| Designation        | Target               | Sequence (5' to 3')        | PAM | On-Target Score | Off-Target Score |
|--------------------|----------------------|----------------------------|-----|-----------------|------------------|
| CTNNA1 Ex7 ABE S   | CTNNA1 Exon 7        | CACCGCTGCAGAAACAAATCATTG   | TGG | 65.5            | 50.7             |
| CTNNA1 Ex7 ABE AS  | CTNNA1 Exon 7        | AAACCAATGATTGTTTCTGCAGC    | TGG | 65.5            | 50.7             |
| HSF1 Ex11 ABE S    | HSF1 Exon 11         | CACCGTCCGCGAGCTGTTCAGCCCCT | CGG | 44.1            | 63.7             |
| HSF1 Ex11 ABE AS   | HSF1 Exon 11         | AAACAGGGGCTGAACAGCTGCGGAC  | CGG | 44.1            | 63.7             |
| JUP Ex10 ABE S     | JUP Exon 10          | CACCGACACAGGATGGTGTGAGGA   | TGG | 52.5            | 28.1             |
| JUP Ex10 ABE AS    | JUP Exon 10          | AAACTCCTCACACCATCCTGTGTC   | TGG | 52.5            | 28.1             |
| AHCY Ex9 ABE S     | AHCY Exon 9          | CACCGCGTGTAGGTGGACCGGTAT   | CGG | 43.9            | 49.0             |
| AHCY Ex9 ABE AS    | AHCY Exon 9          | AAACATACCGGTCCACCTACACGCC  | CGG | 43.9            | 49.0             |
| mCTNNB1 Ex11 S     | Mouse CTNNB1 Exon 11 | CACCGCTCCTAGGAGGGCGTGCGCA  | TGG | 40.4            | 83.7             |
| mCTNNB1 Ex11 AS    | Mouse CTNNB1 Exon 11 | AAACTGCCGACGCCCTCCTAGGAGC  | TGG | 40.4            | 83.7             |
| A-Rich Target 1 S  | GAPDH Exon 1         | CACCGTAAAGAAAGAAAGGGGAGG   | GGG | 54.9            | 20.9             |
| A-Rich Target 1 AS | GAPDH Exon 1         | AAACCCTCCCCTTTCTTTCTTTTAC  | GGG | 54.9            | 20.9             |
| A-Rich Target 2 S  | GAPDH Intron 3       | CACCGAATCTAGGAAAAGCATCACC  | CGG | 64.4            | 37.0             |
| A-Rich Target 2 AS | GAPDH Intron 3       | AAACGGTATGCTTTTCTAGATTC    | CGG | 64.4            | 37.0             |

**Supplementary Table S4:** Oligonucleotide sequences used to generate sgRNAs as well as predicted on-target scores<sup>20</sup> and off-target scores<sup>1</sup>. The splice acceptor adenine or the adenines within the A-rich target sgRNAs are highlighted in red.

| Primer              | Sequence (5' to 3')     | WT Size (bp) | Skip Size (bp) |
|---------------------|-------------------------|--------------|----------------|
| CTNNA1 Ex7 FW       | CACCCTGATGTCGCAGCCTATA  | 484          | 280            |
| CTNNA1 Ex7 REV      | CTGAAACGTGGTCCATGACAGC  | 484          | 280            |
| HSF1 Ex11 FW        | TGCCTGGACAAGAATGAGCTCA  | 374          | 308            |
| HSF1 Ex11REV        | CTCTAGGAGACAGTGGGGTCTCT | 374          | 308            |
| JUP Ex10 FW         | TCTGTGCGTCTCAACTATGGCA  | 565          | 445            |
| JUP Ex10 REV        | GCTTCCGGTAGTCTGGTTCTT   | 565          | 445            |
| AHCY Ex9 FW         | GTCAAGTGGCTCAACGAGAACG  | 441          | 246            |
| AHCY Ex9 REV        | TCCAAGACCACTGAGCTCATGG  | 441          | 246            |
| mCTNNB1 Ex 11 FW    | TGTGGTTAAACTCCTGCACCCA  | 371          | 251            |
| mCTNNB1 Ex 11 REV   | CCCCTGCAGCTACTCTTTGGAT  | 371          | 251            |
| A-Rich Target 1 FW  | ACACTGTCTCTCCTAGGCA     | N/A          | N/A            |
| A-Rich Target 1 REV | GCAGGACACTAGGGAGTCAAGG  | N/A          | N/A            |
| A-Rich Target 2 FW  | GCTTTCTTTCTTTTCGCGCTCT  | N/A          | N/A            |
| A-Rich Target 2 REV | GTGGGAGATCTGGTTTCCGGAA  | N/A          | N/A            |

**Supplementary Table S5:** Nucleotide sequences of primers used for RT-PCR.

| Primer              | Sequence (5' to 3') |
|---------------------|---------------------|
| A-Rich Target 1 Seq | TCCCGAGCCTCCTTCTCTC |
| A-Rich Target 2 Seq | ATCCCTGTCCGGATGCTG  |

**Supplementary Table S6:** Nucleotide sequences of primers used for Sanger sequencing of A-Rich Target PCR amplicons.

| Primer              | Sequence (5' to 3')       | Template | PCR Cycles |
|---------------------|---------------------------|----------|------------|
| CTNNA1 Ex7 ON FW    | GTAGGCCATCTTCTGTGGGACA    | gDNA     | 30         |
| CTNNA1 Ex7 ON REV   | TGTACTIONCCGAAAGCAGGTCCTG | gDNA     | 30         |
| CTNNA1 Ex7 OFF1 FW  | ATGTGCCCGATCTGCGATCTTA    | gDNA     | 30         |
| CTNNA1 Ex7 OFF1 REV | GCCAGTCTAACAGCATGCAGTG    | gDNA     | 30         |
| CTNNA1 Ex7 OFF2 FW  | CGGAAAGGTGTGAACAGATGCT    | gDNA     | 30         |
| CTNNA1 Ex7 OFF2 REV | ACATATCCCGTGTTTGTGCAC     | gDNA     | 30         |
| CTNNA1 Ex7 OFF3 FW  | AGGAGACTGCACGTTCTTTGGA    | gDNA     | 30         |
| CTNNA1 Ex7 OFF3 REV | TTCTCACCTCCAGGCTTCATG     | gDNA     | 30         |
| CTNNA1 Ex7 OFF4 FW  | TTTCAATGCAAAGCTCCCCAC     | gDNA     | 30         |
| CTNNA1 Ex7 OFF4 REV | TAAAGCCTGGCCTCGACATGAA    | gDNA     | 30         |
| CTNNA1 Ex7 cDNA FW  | CACCCTGATGTCGACGCTATA     | cDNA     | 30         |
| CTNNA1 Ex7 cDNA REV | GCAAGTCCCTGGTCTTCTTGGT    | cDNA     | 30         |
| HSF1 Ex11 ON FW     | CTGTTCTGACTTCCCTCCCTCC    | gDNA     | 32         |
| HSF1 Ex11 ON REV    | TGGGACTTGGCTCACCTGAATC    | gDNA     | 32         |
| HSF1 Ex11 OFF1 FW   | CTGTCAATAGGGCCTGACACCA    | gDNA     | 30         |
| HSF1 Ex11 OFF1 REV  | CTGCCAAGTGACCTCCTCTCAA    | gDNA     | 30         |
| HSF1 Ex11 OFF2 FW   | CATCCACCACCAAGAGCTGAGA    | gDNA     | 30         |
| HSF1 Ex11 OFF2 REV  | CCCACCCTCTCACTCTGTCTTG    | gDNA     | 30         |
| HSF1 Ex11 OFF3 FW   | ACCACTCATTCTGGCATCGTGA    | gDNA     | 30         |
| HSF1 Ex11 OFF3 REV  | CTGCCACTCTCACCCTCTCTC     | gDNA     | 30         |
| HSF1 Ex11 OFF4 FW   | TGTGCCGGATCTTAGCCTCAA     | gDNA     | 30         |
| HSF1 Ex11 OFF4 REV  | AAAGGAGGAGAGCTGCGTTCAT    | gDNA     | 30         |
| HSF1 Ex11 cDNA FW   | TGCCTGGACAAGAATGAGCTCA    | cDNA     | 30         |
| HSF1 Ex11 cDNA REV  | TCGGAGAAGTAGGAGCCCTCTC    | cDNA     | 30         |
| JUP Ex10 ON FW      | CTGTGGGTGTGTGTGTAATGG     | gDNA     | 30         |
| JUP Ex10 ON REV     | GCAGGGGGTTGCTAAGTAGTCA    | gDNA     | 30         |
| JUP Ex10 OFF1 FW    | TGCCTCCTGCTGTACTCTTCC     | gDNA     | 30         |
| JUP Ex10 OFF1 REV   | GCTTACTGGGCCATCTCAGTGA    | gDNA     | 30         |
| JUP Ex10 OFF2 FW    | GTAGGGTTTGGCCTTTTGTCTC    | gDNA     | 30         |
| JUP Ex10 OFF2 REV   | CCCAGGTAAAAGCACCAGGTA     | gDNA     | 30         |
| JUP Ex10 OFF3 FW    | TGTCTGTCCTGGTCACGGATT     | gDNA     | 30         |
| JUP Ex10 OFF3 REV   | CCTGTGGTTCTGGGAGTCTCTG    | gDNA     | 30         |
| JUP Ex10 OFF4 FW    | AAAGGGACTGTGGCATCTCCTC    | gDNA     | 30         |
| JUP Ex10 OFF4 REV   | TCACAGGCATCAAGGTGGTAGG    | gDNA     | 30         |
| JUP Ex10 cDNA FW    | TCTGTGCGTCTCAACTATGGCA    | cDNA     | 30         |
| JUP Ex10 cDNA REV   | TGTTCTCCACCGACGAGTACAG    | cDNA     | 30         |
| AHCY Ex9 gON FW     | GAGACGGGCTTTCACTGTGTTG    | gDNA     | 30         |
| AHCY Ex9 gON REV    | AACGGGGTACTTGTCTGGATGG    | gDNA     | 30         |
| AHCY Ex9 OFF1 FW    | TGCTTTTGAACATGCCAGCCAT    | gDNA     | 30         |
| AHCY Ex9 OFF1 REV   | CCAGGAAGGCTTTGCTTCCAAG    | gDNA     | 30         |
| AHCY Ex9 OFF2 FW    | AACCCCTGAACGAGTGGGAATT    | gDNA     | 30         |
| AHCY Ex9 OFF2 REV   | TCCCACAAATCCTCCACTGGTG    | gDNA     | 30         |
| AHCY Ex9 OFF3 FW    | ATCCGGTTCAGTGGACTCTGTG    | gDNA     | 30         |
| AHCY Ex9 OFF3 REV   | AATGTCTGCGGGTCTCTGTCTC    | gDNA     | 30         |
| AHCY Ex9 OFF4 FW    | GGAACACAGGGTTGATGCCATG    | gDNA     | 30         |
| AHCY Ex9 OFF4 REV   | TCCTGAAGTGCGAGTACTGTGG    | gDNA     | 30         |
| AHCY Ex9 cDNA FW    | CATCTTTGTACCACCACAGGC     | cDNA     | 30         |
| AHCY Ex9 cDNA REV   | AGGTACTIONGGGCTTGCTTCTCAG | cDNA     | 30         |

**Supplementary Table S7:** Nucleotide sequences of PCR primers used to generate amplicons for HTS. The number of cycles and type of template DNA used in the PCR is indicated.

**Supplementary Sequences 1:** Amino acid sequences of the ABEs used in this study.

Orange – Adenine Deaminase Domain

Green – Linker Region

Black – Cas9-D10A

Purple – UGI Domain

Red – N-terminal Intein

Blue – C-terminal Intein

Magenta – NLS

Dark Green – 3x HA Tag

wt ABE

MSEVEFSHEYWMRHALTLAKRAWDEREVPVGAVLVHNNRVIGEGWNRPIGRHDPTAHAEIMA  
LRQGGLVMQNYRLIDATLYVTLEPCVMCAGAMIHSRIGRVVFGARDAKTGAAGSLMDVLHHPG  
MNRHVEITEGILADECAALLSDFFRMRRQEIKAQKKAQSSTDSSGSSGGSSGSETPGTSESAT  
PESSGGSSGSSSEVEFSHEYWMRHALTLAKRARDEREVPVGAVLVHNNRVIGEGWNRRAIGLH  
DPTAHAEIMALRQGGLVMQNYRLIDATLYVTFEPCVMCAGAMIHSRIGRVVFGVRNAKTGAAG  
SLMDVLHYPGMNRHVEITEGILADECAALLCYFFRMPRQVFNAQKKAQSSTDSSGSSGGSSG  
SETPGTSESATPESSGGSSGSSDKKYSIGLAIGTNSVGWAVITDEYKVPSKKFKVLGNTDRHSI  
KKNLIGALLFDSGETAEATRLKRTARRRYTRRKNRICYLQEIFSNEMAKVDDSFHRLEESFLVE  
EDKKHERHPIFGNIVDEVAYHEKYPTIYHLRKKLVDSTDKADLRLIYLALAHMIKFRGHFLIEGDL  
NPDNSDVDKLFIQLVQTYNQLFEENPINASGVDAKILSARLSKSRRENLIAQLPGEKKNGLFG  
NLIALSLGLTPNFKSNFDLAEDAQLQLSKDYYDDLDNLLAQIGDQYADFLAAKNLSDAILLSDIL  
RVNTEITKAPLSASMIKRYDEHHQDLTLLKALVRQQLPEKYKEIFFDQSKNGYAGYIDGGASQE  
EFYKFIKPILEKMDGTEELLVKNLREDLLRKQRTFDNGSIPHQIHLGELHAILRRQEDFYFPLKDN  
REKIEKILTFRIPYYYVGPLARGNSRFAMTRKSEETITPWNFEVVDKGASQAQSFIERMTNFDK  
NLPNEKVLPHKSLLYEYFTVYNELTKVKYVTEGMRKPAFLSGEQKKAIVDLLFKTNRKVTVKQL  
KEDYFKKIECFDSVEISGVEDRFNASLGTYHDLLKIIKDKDFLDNEENEDILEDIVLTLTLFEDREM  
IEERLKYAHLFDDKVMKQLKRRRYTGWGRLSRKLINGIRDKQSGKTILDFLKSDFANRNFMQ  
LIHDDSLTFKEDIQKAQVSGQGDSLHEHIANLAGSPAIKKILQTVKVVDELVKVMGRHHPENIVI  
EMARENQTTQKGQKNSRERMKRIEELGKELGSKLKEHPVENTQLQNEKLYLYLQNGRDMYV  
DQELDINRLSDYDVDHIVPQSFLKDDSIDNKVLRSDKNRGKSDNVPSEEVVKKMKNYWRQLL  
NAKLITQRKFDNLTKAERGGLSELKAGFIKRQLVETRQITKHVAQILDSRMNTKYDENDKLIRE  
VKVITLKSCLVSDFRKDFQFYKVRINNYHHAHDAYLNAVVGTAIHKYPKLESEFVYGDYKVDYD  
VRKMIKSEQEIGKATAKYFFYSNIMNFFKTEITLANGEIRKRPLIETNGETGEIVWVKGRDFATV  
RKVLSMPQVNIVKKTEVQTTGGFSKESILPKRNSDKLIARKKDWDPKKYGGFDSPTVAYSVLVVA  
KVEKGKSKKLKSVKELLGITIMERSSEFEKNPIDFLEAKGYKEVKKDLIILPKYSLFELENGRKR  
LASAGELQKGNELALPSKYVNFYLYLASHYEKLKGSPEQNEQKQLFVEQHKHYLDEIIEQISEFSK  
RVILADANLDKVL SAYNKHDKPIREQAENIIHLFTLNLGAPAAFKYFDTTIDRKRYTSTKEVLD  
ATLIHQSI TGLYETRIDLSQLGGDSRADPKKKRKV\*

ABE-AP<sub>5</sub>

MSEVEFSHEYWMRHALTLAKRAWDEREVPVGAVLVHNNRVIGEGWNRPIGRHDPTAHAEIMA  
LRQGGLVMQNYRLIDATLYVTLEPCVMCAGAMIHSRIGRVVFGARDAKTGAAGSLMDVLHHPG  
MNRHVEITEGILADECAALLSDFFRMRRQEIKAQKKAQSSTDSSGSSGGSSGSETPGTSESAT

PESSGGSSGGSSSEVEFSHEYWMRHALTLAKRARDEREVPVGAVLVLNRRVIGEGWNRRAIGLH  
DPTAHAEIMALRQGGLVMQNYRLIDATLYVTTFEPCVMCAGAMIHSRIGRVVFGVRNAKTGAAG  
SLMDVLHYPGMNHRVEITEGILADECAALLCYFFRMPRQVFNAQKKAQSSTDASAPAPAPAPA  
PGTDDKKYSIGLAIGTNSVGWAVITDEYKVPSKKFKVLGNTDRHSIKKNLIGALLFDSGETAEATR  
LKRTARRRYTRRKNRICYLQEIFSNEMAKVDDSFHRLEESFLVEEDKKHERHPIFGNIVDEVAY  
HEKYPTIYHLRKKLVDSTDKADLRLIYLALAHMIKFRGHFLIEGDLNPDNSDVKLFIQLVQTYNQ  
LFEENPINASGVDAKAILSARLSKSRLENLIAQLPGEKKNGLFGNLIASLGLTPNFKSNFDLAE  
DAKLQLSKDTYDDDLNLLAQIGDQYADLFLAAKNLSDAILLSDILRVNTEITKAPLSASMIKRYD  
EHHQDLTLLKALVRQQLPEKYKEIFFDQSKNGYAGYIDGGASQEEFYKFIKPILEKMDGTEELLV  
KLNREDLLRKQRTFDNGSIPHQIHLGELHAILRRQEDFYFPLKDNREKIEKILTFRIPYYVGPLAR  
GNSRFAWMTRKSEETITPWNFEVVDKGAQAQSFIERMTNFDKNLPNEKVLPKHSLLYEYFTV  
YNELTKVKYVTEGMRKPAFLSGEQKKAIVDLLFKTNRKVTVKQLKEDYFKKIECFDSVEISGVED  
RFNASLGTYHDLLKIIKDKDFLDNEENEDILEDIVLTLTLFEDREMIEERLKYAHLFDDKVMKQL  
KRRRYTGWGRLSRKLINGIRDKQSGKTILDFLKSDGFANRNFMLIHHDSLTFKEDIQKAQVSG  
QGDSLHEHIANLAGSPAIKKILQTVKVVDELVKVMGRHKPENIVEMARENQTTQKGQKNSRE  
RMKRIE EGKELGSQILKEHPVENTQLQNEKLYLYLQNGRDMYVDQELDINRLSDYDVDHIVP  
QSFLKDDSIDNKVLTRSDKNRGKSDNVPSEEVVKKMKNYWRQLLNAKLITQRKFDNLTKAERG  
GLSELDKAGFIKRQLVETRQITKHVAQILDSRMNTKYDENDKLIREVKVITLKSCLVSDFRKDFQF  
YKREINNYHHAHDAYLNAVVGTAALIKKYPKLESEFVYGDYKVVYDVRKMIKSEQEIGKATAKYF  
FYSNIMNFFKTEITLANGEIRKRPLIETNGETGEIVWDKGRDFATVRKVL SMPQVNIVKKTEVQT  
GGFSKESILPKRNSDKLIARKKDWDPKKYGGFDSPTVAYSVLVAKVEKGKSKKLSVKELGI  
TIMERSSEKPNIDFLEAKGYKEVKKDLIIPKYSLFELENGRKRMLASAGELQKGNELALPSK  
YVNFYLASHYEKLGSPEDNEQKQLFVEQHKHYLDEIIEQISEFSKRVILADANL DKVLSAYNK  
HRDKPIREQAENIIHLFTLTNLGAPAAFKYFDTTIDRKRYTSTKEVLDATLIHQSI TGLYETRIDL S  
QLGGDSRADPKKKRKV\*

ABE-GGGGS<sub>5</sub>

MSEVEFSHEYWMRHALTLAKRAWDEREVPVGAVLVHNNRVIGEGWNRPIGRHDPTAHAEIMA  
LRQGGLVMQNYRLIDATLYVTLEPCVMCAGAMIHSRIGRVVFGARDAKTGAAGSLMDVLHHPG  
MNHRVEITEGILADECAALLSDFFRMRRQEIKAKKKAQSSTDSSGGSSGGSSGSETPGTSESAT  
PESSGGSSGGSSSEVEFSHEYWMRHALTLAKRARDEREVPVGAVLVLNRRVIGEGWNRRAIGLH  
DPTAHAEIMALRQGGLVMQNYRLIDATLYVTTFEPCVMCAGAMIHSRIGRVVFGVRNAKTGAAG  
SLMDVLHYPGMNHRVEITEGILADECAALLCYFFRMPRQVFNAQKKAQSSTDASGGGGSSGG  
GGGGGGSSGGGGSSGGGGSGTDDKKYSIGLAIGTNSVGWAVITDEYKVPSKKFKVLGNTDRHSIK  
KNLIGALLFDSGETAEATR LKRTARRRYTRRKNRICYLQEIFSNEMAKVDDSFHRLEESFLVEE  
DKKHERHPIFGNIVDEVAYHEKYPTIYHLRKKLVDSTDKADLRLIYLALAHMIKFRGHFLIEGDLN  
PDNSDVKLFIQLVQTYNQLFEENPINASGVDAKAILSARLSKSRLENLIAQLPGEKKNGLFGN  
LIASLGLTPNFKSNFDLAEADAKLQLSKDTYDDDLNLLAQIGDQYADLFLAAKNLSDAILLSDILR  
VNTEITKAPLSASMIKRYDEHHQDLTLLKALVRQQLPEKYKEIFFDQSKNGYAGYIDGGASQEEF  
YKFIKPILEKMDGTEELLVKLNREDLLRKQRTFDNGSIPHQIHLGELHAILRRQEDFYFPLKDNRE  
KIEKILTFRIPYYVGPLARGNSRFAWMTRKSEETITPWNFEVVDKGAQAQSFIERMTNFDKNLP  
NEKVLPKHSLLYEYFTVYNELTKVKYVTEGMRKPAFLSGEQKKAIVDLLFKTNRKVTVKQLKED  
YFKKIECFDSVEISGVEDRFNASLGTYHDLLKIIKDKDFLDNEENEDILEDIVLTLTLFEDREMIEE  
RLKYAHLFDDKVMKQLKRRRYTGWGRLSRKLINGIRDKQSGKTILDFLKSDGFANRNFMLIHH  
DDSLTFKEDIQKAQVSGQGDSLHEHIANLAGSPAIKKILQTVKVVDELVKVMGRHKPENIVEM  
ARENQTTQKGQKNSRERMKRIE EGKELGSQILKEHPVENTQLQNEKLYLYLQNGRDMYVDQ  
ELDINRLSDYDVDHIVPQSFLKDDSIDNKVLTRSDKNRGKSDNVPSEEVVKKMKNYWRQLLNA  
KLITQRKFDNLTKAERGGLELDKAGFIKRQLVETRQITKHVAQILDSRMNTKYDENDKLIREVK  
VITLKSCLVSDFRKDFQFYKREINNYHHAHDAYLNAVVGTAALIKKYPKLESEFVYGDYKVVYDVR

KMIAKSEQEIGKATAKYFFYSNIMNFFKTEITLANGEIRKRPLIETNGETGEIVWDKGRDFATVRK  
VLSMPQVNIVKKTEVQTGGFSKESILPKRNSDKLIARKKDWDPKKYGGFDSPTVAYSVLVAKV  
EKGKSKLKSVKELLGITIMERSSEFEKNPIDFLEAKGYKEVKKDLIIKLPKYSLFELENGRKRMLA  
SAGELQKGNELALPSKYVNFLYLASHYEKLGSPEDNEQKQLFVEQHKHYLDEIIEQISEFSKR  
VILADANLDKVL SAYNKHRDKPIREQAENIIHLFTLTNLGAPAAFKYFDTTIDRKRYTSTKEVLDATL  
IHQSITGLYETRIDLSQLGGDSRADPKKKRKV\*

ABE-Dual

MSEVEFSHEYWMRHALTLAKRAWDEREVPVGAVLVHNNRVIGEGWNRPIGRHDPTAHAEIMA  
LRQGGGLVMQNYRLIDATLYVTLEPCVMCAGAMIHSRIGRVVFGARDAKTGAAGSLMDVLHHPG  
MNRHVEITEGILADECAALLSDFFRMRRQEIKAKKKAQSSTDSSGGSSGGSSGSETPGTSESAT  
PESSGGSSGSSSEVEFSHEYWMRHALTLAKRARDEREVPVGAVLVHNNRVIGEGWNRRAIGLH  
DPTAHAEIMALRQGGGLVMQNYRLIDATLYVTLEPCVMCAGAMIHSRIGRVVFGVRNAKTGAAG  
SLMDVLHYPGMNRHVEITEGILADECAALLCYFFRMPRQVFNAQKKAQSSTDASSGGSSGSSG  
SSETPGTSESATPESSGGSSGSSGGGGSSGGGGSSGGGGSSGGGGSSGGGGSGTDDKYSIGLA  
IGTNSVGWAVITDEYKVPSSKFKVLGNTDRHSIKKNLIGALLFDSGETAEATRLKRTARRRYTRR  
KNRICYLQEIFSNEMAKVDDSFHRLSEESFLVEEDKKHERHPIFGNIVDEVAYHEKYPTIYHLRK  
KLV DSTDKADLR LIYLALAHMIKFRGHFLIEGDLNPDNSDVKLFIQLVQTYNQLFEENPINASGV  
DAKILSARLSKSRLENLIAQLPGEKKNLFGNLIASLGLTPNFKSNFDLAEDAKLQLSKD TYD  
DDL DNLLAQIGDQYADLFLAAKNLSDAILLSDILRVNTEITKAPLSASMIKRYDEHHQDLTLLKALV  
RQQLPEKYKEIFFDQSKNGYAGYIDGGASQEEFYKFIKPILEKMDGTEELLVKNLREDLLRKQRT  
FDNGSIPHQIHLGELHAILRRQEDFYFPLKDNREKIEKILTFRIPYYVGPLARGNSRFAWMTRKS  
EETITPWNFEEVVDKGASAQSFIERMTNFDKNLPNEKVLPHSLLYEYFTVYNELTKVKYVTEG  
MRKPAFLSGEQKKAIVDLLFKTNRKVTVKQLKEDYFKKIECFDSVEISGVEDRFNASLGTYHDLL  
KIIKDKDFLDNEENEDILEDIVLTLTLFEDREMIEERLKYAHLFDDKVMKQLKRRRYTGWGRLS  
RKLINGIRDKQSGKTILDFLKSDFANRNFMLIHHDDSLTFKEDIQKAQVSGQGDLSHEHIANLA  
GSPAIKKQILQTVKVVDELVKVMGRHKPENIVIAMARENQTTQKGQKNSRERMKRIIEGKELG  
SQILKEHPVENTQLQNEKLYLYLQNGRDMYVDQELDINRLSDYDVDHIVPQSFLKDDSIDNKV  
LTRSDKNRGKSDNVPSEEVVKKMKNYWRQLLNAKLITQRKFDNLTKAERGGSELKAGFIKR  
QLVETRQITKHVAQILDSRMNTKYDENDKLIREVKVITLKSCLVSDFRKDFQFYKVVREINNYHHA  
HDAYLNAVVG TALIKKYPKLESEFVYGDYKVDVRKMIKSEQEIGKATAKYFFYSNIMNFFKTEI  
TLANGEIRKRPLIETNGETGEIVWDKGRDFATVRK VLSMPQVNIVKKTEVQTGGFSKESILPKRN  
SDKLIARKKDWDPKKYGGFDSPTVAYSVLVAKVEKKGKSKLKSVKELLGITIMERSSEFEKNPID  
FLEAKGYKEVKKDLIIKLPKYSLFELENGRKRMLASAGELQKGNELALPSKYVNFLYLASHYEK  
LGSPEDNEQKQLFVEQHKHYLDEIIEQISEFSKR VILADANLDKVL SAYNKHRDKPIREQAENIIH  
LFTLTNLGAPAAFKYFDTTIDRKRYTSTKEVLDATLIHQ SITGLYETRIDLSQLGGDSRADPKKKR  
KV\*

ABE-EAAA<sub>5</sub>

MSEVEFSHEYWMRHALTLAKRAWDEREVPVGAVLVHNNRVIGEGWNRPIGRHDPTAHAEIMA  
LRQGGGLVMQNYRLIDATLYVTLEPCVMCAGAMIHSRIGRVVFGARDAKTGAAGSLMDVLHHPG  
MNRHVEITEGILADECAALLSDFFRMRRQEIKAKKKAQSSTDSSGGSSGGSSGSETPGTSESAT  
PESSGGSSGSSSEVEFSHEYWMRHALTLAKRARDEREVPVGAVLVHNNRVIGEGWNRRAIGLH  
DPTAHAEIMALRQGGGLVMQNYRLIDATLYVTLEPCVMCAGAMIHSRIGRVVFGVRNAKTGAAG  
SLMDVLHYPGMNRHVEITEGILADECAALLCYFFRMPRQVFNAQKKAQSSTDASEAAAEAAAE  
AAAEAAAEAAAGTDDKYSIGLAIGTNSVGWAVITDEYKVPSSKFKVLGNTDRHSIKKNLIGALLF  
DSGETAEATRLKRTARRRYTRRKNRICYLQEIFSNEMAKVDDSFHRLSEESFLVEEDKKHERHP  
IFGNIVDEVAYHEKYPTIYHLRKKLV DSTDKADLR LIYLALAHMIKFRGHFLIEGDLNPDNSDVK

LFIQLVQTYNQLFEENPINASGVDAKAILSARLSKSRRENLIAQLPGEKKNGLFGNLIASLGLT  
PNFKSNFDLAEDAKLQLSKDXYDDDLNLLAQIGDQYADLFLAAKNLSDAILLSDILRVNTEITKA  
PLSASMIKRYDEHHQDLTLLKALVRQQLPEKYKEIFFDQSKNGYAGYIDGGASQEEFYKFIKPI  
EKMDGTEELLVKNLREDLLRKQRTFDNGSIPHQIHLGELHAILRRQEDFYFPLKDNREKIEKILT  
RIPYYVGPLARGNSRFAWMTRKSEETITPWNFEVVDKGASAQSFIERMTNFDKNLPNEKVLP  
KHSLLYEYFTVYNELTKVKYVTEGMRKPAFLSGEQKKAIVDLLFKTNRKVTVKQLKEDYFKKIEC  
FDSVEISGVEDRFNASLGTYHDLLKIIKDKDFLDNEENEDILEDIVLTLTLFEDREMIEERLKTYAH  
LFDDKVMKQLKRRRYTGWGRLSRKLINGIRDKQSGKTILDFLKSDFANRNFMLIHDDSLTFK  
EDIQKAQVSGQGDSLHEHIANLAGSPAIKKGILQTVKVVDELVKVMGRHHPENIVEMARENQTT  
QKGQKNSRERMKRIEEGIKELGSQILKEHPVENTQLQNEKLYLYYLQNGRDMYVDQELDINRLS  
DYDVDHIVPQSFLKDDSIDNKVLTRSDKNRGKSDNVPSEEVVKKMKNYWRQLLNAKLITQRKF  
DNLTKAERGGLSELDKAGFIKRQLVETRQITKHVAQILDSRMNTKYDENDKLIREVKVITLKS  
SDFRKDFQFYKREINNYHHAHDAYLNAVVGTAIHKYPKLESEFVYGDYKVDVRKMIKSEQ  
EIGKATAKYFFYSNIMNFFKTEITLANGEIRKRPLIETNGETGEIVWDKGRDFATVRKVL  
SMPQVNIVKKTEVQTGGFSKESILPKRNSDKLIARKDWDPKKYGGFDSPTVAYSVLVVA  
KVEKGSKLLKSVKELLGITIMERSSEFEKNPIDFLEAKGYKEVKKDLIILPKYSLFELENGR  
KMLASAGELQKGNELALPSKYVNFLYLASHYEKLGSPEDNEQKQLFVEQHKHYLDEIIEQISE  
FSKRVLADANLKVLSAYNKHRDKPIREQAENIIHLFTLTNLGAPAAFKYFDTTIDRKRYTST  
KVELDATLIHQSITEGLYETRIDLSQLGGDSRADPKKKRKV\*

ABE-UGI

MSEVEFSHEYWMRHALTLAKRAWDEREVPVGAVLVHNNRVIGEGWNRPIGRHDPTAHAEIMA  
LRQGGGLVMQNYRLIDATLYVTLEPCVMCAGAMIHSRIGRVVFGARDAKTGAAGSLMDVLHHPG  
MNRHVEITEGILADECAALLSDFFRMRRQEIKAKKAQSSTDGGSSGGSSGSETPGTSESAT  
PESSGGSSGSSSEVEFSHEYWMRHALTLAKRARDEREVPVGAVLVLNNRVIGEGWNRRAIGLH  
DPTAHAEIMALRQGGGLVMQNYRLIDATLYVTLEPCVMCAGAMIHSRIGRVVFGVRNAKTGAAG  
SLMDVLHYPGMNRHVEITEGILADECAALLCYFFRMPRQVFNAQKKAQSSTDGGSSGGSSG  
SETPGTSESATPESSGGSSGSSDKKYSIGLAIGTNSVGWAVITDEYKVPSKKFKVLGNTDRHSI  
KKNLIGALLFDSGETAEATRLKRTARRRYTRRKNRICYLQEIFSNEMAKVDDSSFFHRLEESFLVE  
EDKKHERHPHIFGNIVDEVAYHEKYPTIYHLRKKLVDSTDKADLRLIYLALAHMIKFRGHFLIEGDL  
NPDNSDVKLFIQLVQTYNQLFEENPINASGVDAKAILSARLSKSRRENLIAQLPGEKKNGLFG  
NLIASLGLTPNFKSNFDLAEDAKLQLSKDXYDDDLNLLAQIGDQYADLFLAAKNLSDAILLSDIL  
RVNTEITKAPLSASMIKRYDEHHQDLTLLKALVRQQLPEKYKEIFFDQSKNGYAGYIDGGASQE  
EFYKFIKPILEKMDGTEELLVKNLREDLLRKQRTFDNGSIPHQIHLGELHAILRRQEDFYFPLKDN  
REKIEKILTFRIPYYVGPLARGNSRFAWMTRKSEETITPWNFEVVDKGASAQSFIERMTNFDK  
NLPNEKVLPKHSLLYEYFTVYNELTKVKYVTEGMRKPAFLSGEQKKAIVDLLFKTNRKVTVKQL  
KEDYFKKIECFDSVEISGVEDRFNASLGTYHDLLKIIKDKDFLDNEENEDILEDIVLTLTLFEDREM  
IEERLKTYAHLFDDKVMKQLKRRRYTGWGRLSRKLINGIRDKQSGKTILDFLKSDFANRNFMLQ  
LIHDDSLTFKEDIQKAQVSGQGDSLHEHIANLAGSPAIKKGILQTVKVVDELVKVMGRHHPENIVI  
EMARENQTTQKGQKNSRERMKRIEEGIKELGSQILKEHPVENTQLQNEKLYLYYLQNGRDMYV  
DQELDINRLSDYDVDHIVPQSFLKDDSIDNKVLTRSDKNRGKSDNVPSEEVVKKMKNYWRQLL  
NAKLITQRKFDNLTKAERGGLSELDKAGFIKRQLVETRQITKHVAQILDSRMNTKYDENDKLIRE  
VKVITLKSCLVSDFRKDFQFYKREINNYHHAHDAYLNAVVGTAIHKYPKLESEFVYGDYKVD  
VRKMIKSEQEIGKATAKYFFYSNIMNFFKTEITLANGEIRKRPLIETNGETGEIVWDKGRDFATV  
RKVLSMPQVNIVKKTEVQTGGFSKESILPKRNSDKLIARKDWDPKKYGGFDSPTVAYSVLVVA  
KVEKGSKLLKSVKELLGITIMERSSEFEKNPIDFLEAKGYKEVKKDLIILPKYSLFELENGR  
KMLASAGELQKGNELALPSKYVNFLYLASHYEKLGSPEDNEQKQLFVEQHKHYLDEIIEQISE  
FSKRVLADANLKVLSAYNKHRDKPIREQAENIIHLFTLTNLGAPAAFKYFDTTIDRKRYTST  
KVELDATLIHQSITEGLYETRIDLSQLGGDSRADGGSTNLSDIIEKETGKQLVIQESILMLPEEVEE  
VIGNKPEDILVHTAYDESTDENVMLLTSDAPEYKPWALVIQDSNGENKIKMLGGSPKKRKV\*



ABE-GGGGS<sub>1</sub>-UGI

MSEVEFSHEYWMRHALTLAKRAWDEREVPVGAVLVHNNRVIGEGWNRPIGRHDPTAHAEIMALRQGGGLVMQNYRLIDATLYVTLEPCVMCAGAMIHSRIGRVVFGARDAKTGAAGSLMDVLHHPGMNHRVEITEGILADECAALLSDFFRMRRQEIKAKKKAQSSTDSSGSSGGSSGSETPGTSESATPESSGGSSGGSSSEVEFSHEYWMRHALTLAKRARDEREVPVGAVLVLNRRVIGEGWNRRAIGLHDPTAHAEIMALRQGGGLVMQNYRLIDATLYVTFEPCVMCAGAMIHSRIGRVVFGVRNAKTGAAGSLMDVLHYPGMNHRVEITEGILADECAALLCYFFRMPRQVFNAQKKAQSSTDASGGGGSSGTDKKYSIGLAIGTNSVGWAVITDEYKVPSKKFKVLGNTDRHSIKKNLIGALLFDSGETAEATRLKRTARRRYTRRKNRICYLQEIFSNEMAKVDDSSFFHRLEESFLVEEDKKHERHPIFGNIVDEVAYHEKYPTIYHLRKKLVDSTDKADLRLIYLALAHMIKFRGHFLIEGDLNPDNSDVKLFIQLVQTYNQLFEE NPINASGVDAKAILSARLSKSRLENLIAQLPGEKKNLFGNLIALSLGLTPNFKSNFDLAEDAKLQLSKDQTYDDDLDNLLAQIGDQYADLFLAAKNLSDAILLSDILRVNTEITKAPLSASMIKRYDEHHQDLTLLKALVRQQLPEKYKEIFFDQSKNGYAGYIDGGASQEEFYKFIKPILEKMDGTEELLVKLNR EDLLRKQRTFDNGSIPHQIHLGELHAILRRQEDFYFPLKDNREKIEKILTFRIPYYVGPLARGNSRFAWMTRKSEETITPWNFEVVDKVGASQAQSFIERMTNFDKNLPNEKVLPHKSHLLYEYFTVYNELTKVKYVTEGMRKPAFLSGEQKKAIVDLLFKTNRKVTVKQLKEDYFKKIECFDSVEISGVEDRFNASLGTYHDLLKIIKDKDFLDNEENEDILEDIVLTLTLFEDREMIEERLKYAHLFDDKVMKQLKRRRYTGWGRLSRKLINGIRDKQSGKTILDFLKSDGFANRNFMQLIHDDSLTFKEDIQKAQVSGQGDSLHEHIANLAGSPAIKKILQTVKVVDELVKVMGRHKPENIVIAMARENQTTQKGQKNSRERMKRIEEGIKELGSQLKEHPVENTQLQNEKLYLYLQNGRDMYVDQELDINRLSDYDVDHIVPQSFLKDDSIDNKVLRSDKNRGKSDNVPSEEVVKKMKNYWRQLLNAKLITQRKFDNLTKAERGGSEL DKAGFIKRQLVETRQITKHVAQILDSRMNTKYDENDKLIREVKVITLKSCLVSDFRKDFQFYKVR EINNYYHHAHDAYLNAVVGTAALIKKYPKLESEFVYGDYKVYDVRKMIKSEQEIGKATAKYFFYSNIMNFFKTEITLANGEIRKRPLIETNGETGEIVWDKGRDFATVRKVL SMPQVNIKKTEVQTGGFSKESILPKRNSDKLIARKKDWDPKKYGGFDSPTVAYSVLVAKVEKGKSKLKSVELLGITIMERSSFEKNPIDFLEAKGYKEVKKDLIILPKYSLFELENGRKRMLASAGELQKGNELALPSKYVNFLYLASHYEKLGSPEDNEQKQLFVEQHKHYLDEIIEQISEFSKRVILADANLDKVL SAYNKHHRDKPIREQAENIIHLFTLTNLGAPAAFKYFDTTIDRKRYTSTKEVLDATLIHQSI TGLYETRIDLSQLGGDSRADSSGSTNLSDIIEKETGKQLVIQESILMLPEEVEEVIGNKPESDILVHTAYDESTDENVMLLTSDAPEYKPWALVIQDSNGENKIKMLSSGSPKKKRV\*

ABE-GGGGS<sub>2</sub>-UGI

MSEVEFSHEYWMRHALTLAKRAWDEREVPVGAVLVHNNRVIGEGWNRPIGRHDPTAHAEIMALRQGGGLVMQNYRLIDATLYVTLEPCVMCAGAMIHSRIGRVVFGARDAKTGAAGSLMDVLHHPGMNHRVEITEGILADECAALLSDFFRMRRQEIKAKKKAQSSTDSSGSSGGSSGSETPGTSESATPESSGGSSGGSSSEVEFSHEYWMRHALTLAKRARDEREVPVGAVLVLNRRVIGEGWNRRAIGLHDPTAHAEIMALRQGGGLVMQNYRLIDATLYVTFEPCVMCAGAMIHSRIGRVVFGVRNAKTGAAGSLMDVLHYPGMNHRVEITEGILADECAALLCYFFRMPRQVFNAQKKAQSSTDASGGGGSSGGSSGTDKKYSIGLAIGTNSVGWAVITDEYKVPSKKFKVLGNTDRHSIKKNLIGALLFDSGETAEATRLKRTARRRYTRRKNRICYLQEIFSNEMAKVDDSSFFHRLEESFLVEEDKKHERHPIFGNIVDEVAYHEKYPTIYHLRKKLVDSTDKADLRLIYLALAHMIKFRGHFLIEGDLNPDNSDVKLFIQLVQTYNQLFEENPINASGVDAKAILSARLSKSRLENLIAQLPGEKKNLFGNLIALSLGLTPNFKSNFDLAEDAKLQLSKDQTYDDDLDNLLAQIGDQYADLFLAAKNLSDAILLSDILRVNTEITKAPLSASMIKRYDEHHQDLTLLKALVRQQLPEKYKEIFFDQSKNGYAGYIDGGASQEEFYKFIKPILEKMDGTEELLVKLNREDLLRKQRTFDNGSIPHQIHLGELHAILRRQEDFYFPLKDNREKIEKILTFRIPYYVGPLARGNSRFAWMTRKSEETITPWNFEVVDKVGASQAQSFIERMTNFDKNLPNEKVLPHKSHLLYEYFTVYNELTKVKYVTEGMRKPAFLSGEQKKAIVDLLFKTNRKVTVKQLKEDYFKKIECFDSVEISGVE

DRFNASLGTYHDLLKIIKDKDFLDNEENEDILEDIVLTLTLFEDREMIEERLKTYAHLFDDKVMKQ  
LKRRRYTGWGRLSRKLINGIRDKQSGKTILDFLKSDGFANRNFMLIHDDSLTFKEDIQKAQVS  
GGGDSLHEHIANLAGSPAIKKGILQTVKVVDELVKVMGRHKPENIVIAMARENQTTQKGQKNSR  
ERMKRIEEGKELGSQILKEHPVENTQLQNEKLYLYLQNGRDMYVDQELDINRLSDYVDHIV  
PQSFLKDDSIDNKVLTRSDKNRGKSDNVPSEEVVKKMKNYWRQLLNAKLITQRKFDNLTKAER  
GGLSELDKAGFIKRQLVETRQITKHVAQILDSRMNTKYDENDKLIREVKVITLKSCLVSDFRKDF  
QFYKVVREINNYHHAHDAYLNAVVGTAIIKKYPKLESEFVYGDYKVVYDVRKMIKSEQEIGKATA  
KYFFYSNIMNFFKTEITLANGEIRKRPLIETNGETGEIVWDKGRDFATVRKVL SMPQVNIVKKTEV  
QTGGFSKESILPKRNSDKLIARKKDWDPKKYGGFDSPTVAYSVLVAKVEKGKSKKLKSVKELL  
GITIMERSSEFEKNPIDFLEAKGYKEVKKDLIIKLPKYSLFELENGRKRMLASAGELQKGNELALPS  
KYVNFLYLASHYEKLGSPEDNEQKQLFVEQHKHYLDEIIEQISEFSKRVLADANLDKVL SAYN  
KHRDKPIREQAENIIHLFTLTNLGAPAAFKYFDTTIDRKRYTSTKEVLDATLIHQ SITGLYETRIDL  
QLGGDSRADSGGSTNLSDIIEKETGKQLVIQESILMLPEEVEEVIGNKPESDILVHTAYDESTDE  
NVMLLTSDAPEYKPWALVIQDSNGENKIKMLSGGSPKKKRKV\*

ABE-GGGGS<sub>3</sub>-UGI

MSEVEFSHEYWMRHALTLAKRAWDEREVPVGA VLVHNNRVIGEGWNRPIGRHDPTAHAEIMA  
LRQGGGLVMQNYRLIDATLYVTLEPCVMCAGAMIHSRIGRVVFGARDAKTGAAGSLMDVLHHPG  
MNRHVEITEGILADECAALLSDFFRMRRQEIKAKKAQSSTD SGGSSGGSSGSETPGTSESAT  
PESSGGSSGGSSSEVEFSHEYWMRHALTLAKRARDEREVPVGA VLVNNRVIGEGWNRRAIGLH  
DPTAHAEIMALRQGGGLVMQNYRLIDATLYVTLEPCVMCAGAMIHSRIGRVVFGVRNAKTGAAG  
SLMDVLHYPGMNRHVEITEGILADECAALLCYFFRMPRQVFNAQKKAQSSTDA SGGGGSSGGG  
GGGGGGSGTDDKYSIGLAIGTNSVGWAVITDEYKVP SKKFKVLGNTDRHSIKKNLIGALLFDSG  
ETAETRLKRTARRRYTRRKNRICYLQEIFS NEMAKVDDSFHRLEESFLVEEDKKHERHPIFG  
NIVDEVAYHEKYPTIYHLRKKLVDSTDKADLR LIYLALAHMIKFRGHFLIEGDLNPDNSDVKLFI  
QLVQTYNQLFEENPINASGVDAKILSARLSKSRLENLIAQLPGEKKNGLFGNLIASLGLTPNF  
KSNFDLAEDAQLQSKDQYDDDLNLLAQIGDQYADLFLAAKNLSDAILLSDILRVNTEITKAPLS  
ASMIKRYDEHHQDLTLLKALVRQQLPEKYKEIFFDQSKNGYAGYIDGGASQEEFYKFIKPILEKM  
DGTEELLVKNLREDLLRKQRTFDNGSIPHQIHLGELHAILRRQEDFY PFLKDNREKIEKILTFRIPY  
YVGPLARGNSRFAWMTRKSEETITPWNFE EVDKGASAQSFIERMTNFDKNLPNEKVL PKHSL  
LYEYFTVYNELTKVKYVTEGMRKPAFLSGEQKKAIVDLLFKTNRKVTVKQLKEDYFKKIECFDSV  
EISGVEDRFNASLGTYHDLLKIIKDKDFLDNEENEDILEDIVLTLTLFEDREMIEERLKTYAHLFDD  
KVMKQLKRRRYTGWGRLSRKLINGIRDKQSGKTILDFLKSDGFANRNFMLIHDDSLTFKEDIQ  
KAQVSGGDSLHEHIANLAGSPAIKKGILQTVKVVDELVKVMGRHKPENIVIAMARENQTTQKG  
QKNSRERMKRIEEGKELGSQILKEHPVENTQLQNEKLYLYLQNGRDMYVDQELDINRLSDYD  
VDHIVPQSFLKDDSIDNKVLTRSDKNRGKSDNVPSEEVVKKMKNYWRQLLNAKLITQRKFDNLT  
KAERGGLSELDKAGFIKRQLVETRQITKHVAQILDSRMNTKYDENDKLIREVKVITLKSCLVSDFR  
RKDFQFYKVVREINNYHHAHDAYLNAVVGTAIIKKYPKLESEFVYGDYKVVYDVRKMIKSEQEIG  
KATAKYFFYSNIMNFFKTEITLANGEIRKRPLIETNGETGEIVWDKGRDFATVRKVL SMPQVNIVK  
KTEVQTGGFSKESILPKRNSDKLIARKKDWDPKKYGGFDSPTVAYSVLVAKVEKGKSKKLKSV  
KELLGITIMERSSEFEKNPIDFLEAKGYKEVKKDLIIKLPKYSLFELENGRKRMLASAGELQKGNEL  
ALPSKYVNFLYLASHYEKLGSPEDNEQKQLFVEQHKHYLDEIIEQISEFSKRVLADANLDKVL S  
AYNKHRDKPIREQAENIIHLFTLTNLGAPAAFKYFDTTIDRKRYTSTKEVLDATLIHQ SITGLYETR  
IDLSQLGGDSRADSGGSTNLSDIIEKETGKQLVIQESILMLPEEVEEVIGNKPESDILVHTAYDES  
TDENVMLLTSDAPEYKPWALVIQDSNGENKIKMLSGGSPKKKRKV\*

ABE-GGGGS<sub>4</sub>-UGI

MSEVEFSHEYWMRHALTLAKRAWDEREVPVGAVLVHNNRVIGEGWNRPIGRHDPTAHAEIMALRQGGGLVMQNYRLIDATLYVTLEPCVMCAGAMIHSRIGRVVFGARDAKTGAAGSLMDVLHHPGMNHRVEITEGILADECAALLSDFFRMRRQEIKAKKKAQSSTDSSGGSSGGSSGSETPGTSESATPESSGGSSGGSSSEVEFSHEYWMRHALTLAKRARDEREVPVGAVLVLNNRVIGEGWNRRAIGLHDPTAHAEIMALRQGGGLVMQNYRLIDATLYVTLEPCVMCAGAMIHSRIGRVVFGVRNAKTGAAGSLMDVLHYPGMNHRVEITEGILADECAALLCYFFRMPRQVFNAQKKAQSSTDASSGGSSGGSSGGSSGGSSGGSSGTDKKYSIGLAIGTNSVGWAVITDEYKVPSSKFKVLGNTDRHSIKKNLIGALFDSGETAEATRLKRTARRRYTRRKNRICYLQEIFSNEMAKVDDSFHRLEESFLVEEDKKHERHPIFGNIVDEVAYHEKYPTIYHLRKKLVDSTDKADLRLIYLALAHMIKFRGHFLIEGDLNPDNSDVKLFIQLVQTYNQLFEENPINASGVDAKAILSARLSKSRLENLIAQLPGEKKNGLFGNLIASLGLTPNFKSNFDLAEDAQLQSKDQYDDDLNLLAQIGDQYADLFLAAKNLSDAILLSDILRVNTEITKAPLSASMIKRYDEHHQDLTLLKALVRQQLPEKYKEIFFDQSKNGYAGYIDGGASQEEFYKFIKILEKMDGTEELLVKNREDLLRKQRTFDNGSIPHQIHLGELHAILRRQEDFYFPLKDNREKIEKILTFRIPYYVGPLARGNSRFAWMTRKSEETITPWNFEVVDKGASAQSFIERMTNFDKNLPNEKVLPHKSHLLYEYFTVYNELTKVKYVTEGMRKPAFLSGEQKKAIVDLLFKTNRKVTVKQLKEDYFKKIECFDSVEISGVEDRFNASLGTYHDLLKIIKDKDFLDNEENEDILEDIVLTLTLFEDREMIEERLKYTAHLFDDKVMKQLKRRRYTGWGRLSRKLINGIRDKQSGKTILDFLKSDGFANRNFMQLIHDDSLTFKEDIQKAQVSGQGDLSLHEHIANLAGSPAIKKILQTVKVVDELVKVMGRHKPENIVIAMARENQTTQKGQKNSRERMKRIEIEGKELGSQILKEHPVENTQLQNEKLYLYLQNGRDMYVDQELDINRLSDYDVDHIVPQSFLKDDSIDNKVLTRSDKNRGKSDNVPSEEVVKKMKNYWRQLLNAKLITQRKFDNLTKAERGGELSELDKAGFIKRQLVETRQITKHVAQILD SRMNTKYDENDKLIREVKVITLKSCLVSDFRKDFQFYKVINNYHHAHDAYLNAVVG TALIKKYPKLESEFVYGDYKVYDVRKMIAKSEQEIGKATAKYFFYSNIMNFFKTEITLANGEIRKRPLIETNGETGEIVWDKGRDFATVRKVL SMPQVNIVKTEVQTGGFSKESILPKRNSDKLIARKKDWDPKKGFFSPTVAYSVLVAKVEKGSKKLKS VKELLGITIMERSSEFKNPIDFLEAKGYKEVKKDLIIKLPKYSLFELENGRKRMLASAGELQKGNELALPSKYVNFYLASHYEKLGSPEDNEQKQLFVEQHKHYLDEIIIEQISEFSKRVLADANLDKVL SAYNKHRDKPIREQAENIIHLFTLNLGAPAAFYFDTTIDRKRYTSTKEVL DATLIHQSIGLYETRIDLSQLGGDSRADSSGSSNLSDIIEKETGKQLVIQESILMLPEEVVEEVIGNKPESDILVHTAYDESTDENVMLLTSDAPEYKPWALVIQDSNGENKIKMLS GSSPKKKRKV\*

ABE-GGGGS<sub>5</sub>-UGI

MSEVEFSHEYWMRHALTLAKRAWDEREVPVGAVLVHNNRVIGEGWNRPIGRHDPTAHAEIMALRQGGGLVMQNYRLIDATLYVTLEPCVMCAGAMIHSRIGRVVFGARDAKTGAAGSLMDVLHHPGMNHRVEITEGILADECAALLSDFFRMRRQEIKAKKKAQSSTDSSGGSSGGSSGSETPGTSESATPESSGGSSGGSSSEVEFSHEYWMRHALTLAKRARDEREVPVGAVLVLNNRVIGEGWNRRAIGLHDPTAHAEIMALRQGGGLVMQNYRLIDATLYVTLEPCVMCAGAMIHSRIGRVVFGVRNAKTGAAGSLMDVLHYPGMNHRVEITEGILADECAALLCYFFRMPRQVFNAQKKAQSSTDASSGGSSGGSSGGSSGGSSGGSSGTDKKYSIGLAIGTNSVGWAVITDEYKVPSSKFKVLGNTDRHSIKKNLIGALLFDSGETAEATRLKRTARRRYTRRKNRICYLQEIFSNEMAKVDDSFHRLEESFLVEEDKKHERHPIFGNIVDEVAYHEKYPTIYHLRKKLVDSTDKADLRLIYLALAHMIKFRGHFLIEGDLNPDNSDVKLFIQLVQTYNQLFEENPINASGVDAKAILSARLSKSRLENLIAQLPGEKKNGLFGNLIASLGLTPNFKSNFDLAEDAQLQSKDQYDDDLNLLAQIGDQYADLFLAAKNLSDAILLSDILRVNTEITKAPLSASMIKRYDEHHQDLTLLKALVRQQLPEKYKEIFFDQSKNGYAGYIDGGASQEEFYKFIKPILEKMDGTEELLVKNREDLLRKQRTFDNGSIPHQIHLGELHAILRRQEDFYFPLKDNREKIEKILTFRIPYYVGPLARGNSRFAWMTRKSEETITPWNFEVVDKGASAQSFIERMTNFDKNLPNEKVLPHKSHLLYEYFTVYNELTKVKYVTEGMRKPAFLSGEQKKAIVDLLFKTNRKVTVKQLKEDYFKKIECFDSVEISGVEDRFNASLGTYHDLLKIIKDKDFLDNEENEDILEDIVLTLTLFEDREMIEERLKYTAHLFDDKVMKQLKRRRYTGWGRLSRKLINGIRDKQSGKTILDFLKSDGFANRNFMQLIHDDSLTFKEDIQKAQVSGQGDLSLHEHIANLAGSPAIKKILQTVKVVDELVKVMGRHKPENIVIAMARENQTTQKGQKNSRERMKRIEIEGKELGSQILKEHPVENTQLQNEKLYLYLQNGRDMYVDQELDINRLSDYDVDHIVPQSFLKDDSIDNKVLTRSDKNRGKSDNVPSEEVVKKMKNYWRQLLNAKLITQRKFDNLTKAERGGELSELDKAGFIKRQLVETRQITKHVAQILD SRMNTKYDENDKLIREVKVITLKSCLVSDFRKDFQFYKVINNYHHAHDAYLNAVVG TALIKKYPKLESEFVYGDYKVYDVRKMIAKSEQEIGKATAKYFFYSNIMNFFKTEITLANGEIRKRPLIETNGETGEIVWDKGRDFATVRKVL SMPQVNIVKTEVQTGGFSKESILPKRNSDKLIARKKDWDPKKGFFSPTVAYSVLVAKVEKGSKKLKS VKELLGITIMERSSEFKNPIDFLEAKGYKEVKKDLIIKLPKYSLFELENGRKRMLASAGELQKGNELALPSKYVNFYLASHYEKLGSPEDNEQKQLFVEQHKHYLDEIIIEQISEFSKRVLADANLDKVL SAYNKHRDKPIREQAENIIHLFTLNLGAPAAFYFDTTIDRKRYTSTKEVL DATLIHQSIGLYETRIDLSQLGGDSRADSSGSSNLSDIIEKETGKQLVIQESILMLPEEVVEEVIGNKPESDILVHTAYDESTDENVMLLTSDAPEYKPWALVIQDSNGENKIKMLS GSSPKKKRKV\*

ARENQTTQKGQKNSRERMKRIEEGIKELGSQILKEHPVENTQLQNEKLYLYYLQNGRDMYVDQ  
ELDINRLSDYDVDHIVPQSFLKDDSIDNKVLTRSDKNRGKSDNVPSEEVVKKMKNYWRQLLNA  
KLITQRKFDNLTKAERGGLSELDKAGFIKRQLVETRQITKHVAQILDSRMNTKYDENDKLIREVK  
VITLKSCLVSDFRKDFQFYKVRINNYHHAHDAYLNAVVGTAIIKKYPKLESEFVYGDYKVDVR  
KMIKSEQEIGKATAKYFFYSNIMNFFKTEITLANGEIRKRPLIETNGETGEIVWDKGRDFATVRK  
VLSMPQVNIVKKTEVQTGGFSKESILPKRNSDKLIARKKDWDPKKYGGFDSPTVAYSVLVAKV  
EKGKSKKLKSVKELLGITIMERSSEFEKNPIDFLEAKGYKEVKKDLIIKLPKYSLFELENGRKRMLA  
SAGELQKGNELALPSKYVNFLYLASHYEKLGSPEDNEQKQLFVEQHKHYLDEIIEQISEFSKRV  
ILADANLDKVL SAYNKHRDKPIREQAENIIHLFTLTNLGAPAAFKYFDTTIDRKRYTSTKEVLDTL  
IHQSITGLYETRIDLSQLGGDSRADSGGSTNLSDIIEKETGKQLVIQESILMLPEEVEEIGNKPES  
DILVHTAYDESTDENVMLLTSDAPEYKPWALVIQDSNGENKIKMLSGGSPKKKRKV\*

ABE-GGGGS<sub>6</sub>-UGI

MSEVEFSHEYWMRHALTLAKRAWDEREVPVGAVLVHNNRVIGEGWNRPIGRHDPTAHAEIMA  
LRQGGGLVMQNYRLIDATLYVTLEPCVMCAGAMIHSRIGRVVFGARDAKTGAAGSLMDVLHHPG  
MNRHVEITEGILADECAALLSDFFRMRRQEIKAQKKAQSSTDSSGSSGGSSGSETPGTSESAT  
PESSGGSSGGSSSEVEFSHEYWMRHALTLAKRARDEREVPVGAVLVHNNRVIGEGWNRRAIGLH  
DPTAHAEIMALRQGGGLVMQNYRLIDATLYVTFEPCVMCAGAMIHSRIGRVVFGVRNAKTGAAG  
SLMDVLHYPGMNRHVEITEGILADECAALLCYFFRMPRQVFNAQKKAQSSTDASSGGSSGGG  
SSGGSSGGSSGGSSGGSSGGSSGGSSGTDKKYSIGLAIGTNSVGWAVITDEYKVPKSKFKVLGNT  
DRHSIKKNLIGALLFDSGETAEATRLKRTARRRYTRRKNRICYLQEIFSNEMAKVDSDSFFHRL  
SFLVEEDKHERHPIFGNIVDEVAYHEKYPTIYHLRKKLVDSTDKADLRLIYLALAHMIKFRGHFLI  
EGDLNPDNSDVKLFIQLVQTYNQLFEENPINASGVDAKAILSARLSKSRLENLIAQLPGEKKN  
GLFGNLIALLSGLTPNFKSNFDLAEDAKLQLSKD TYDDDLDNLLAQIGDQYADLFLAAKNLSDAIL  
LSDILRVNTEITKAPLSASMIKRYDEHHQDLTLLKALVRQQLPEKYKEIFFDQSKNGYAGYIDGG  
ASQEEFYKFIKPILEKMDGTEELLVKLNREDLLRKQRTFDNGSIPHQIHLGELHAILRRQEDFYFP  
LKDNREKIEKILTRIPYYVGPLARGNSRFAMTRKSEETITPWNFEVVVDKGASAQSFIERMT  
NFDKNLPNEKVLPKHSLLEYEFTVYNELTKVKYVTEGMRKPAFLSGEQKKAIVDLLFKTNRKVT  
VKQLKEDYFKKIECFDSVEISGVEDRFNASLGTYHDLLKIIKDKDFLDNEENEDILEDIVLTLTLE  
DREMIEERLKYAHLFDDKVMKQLKRRRYTGWGRLSRKLINGIRDKQSGKTILDFLKSDGFANR  
NFMQLIHDDSLTFKEDIQKAQVSGQGDLSLHEHIANLAGSPAIKKGIQTVKVDELVKVMGRHK  
PENIVEMARENQTTQKGQKNSRERMKRIEEGIKELGSQILKEHPVENTQLQNEKLYLYYLQNG  
RDMYVDQELDINRLSDYDVDHIVPQSFLKDDSIDNKVLTRSDKNRGKSDNVPSEEVVKKMKNY  
WRQLLNAKLITQRKFDNLTKAERGGLSELDKAGFIKRQLVETRQITKHVAQILDSRMNTKYDEN  
DKLIREVKVITLKSCLVSDFRKDFQFYKVRINNYHHAHDAYLNAVVGTAIIKKYPKLESEFVY  
DYKVDVRKMIKSEQEIGKATAKYFFYSNIMNFFKTEITLANGEIRKRPLIETNGETGEIVWDK  
GRDFATVRKVLVLSMPQVNIVKKTEVQTGGFSKESILPKRNSDKLIARKKDWDPKKYGGFDSPTVAY  
SVLVVAKVEKKGKSKKLKSVKELLGITIMERSSEFEKNPIDFLEAKGYKEVKKDLIIKLPKYSLFELE  
NGRKRMLASAGELQKGNELALPSKYVNFLYLASHYEKLGSPEDNEQKQLFVEQHKHYLDEIIEQ  
ISEFSKRVILADANLDKVL SAYNKHRDKPIREQAENIIHLFTLTNLGAPAAFKYFDTTIDRKRYTST  
KEVLDTLIHQ SITGLYETRIDLSQLGGDSRADSGGSTNLSDIIEKETGKQLVIQESILMLPEEVEE  
VIGNKPESDILVHTAYDESTDENVMLLTSDAPEYKPWALVIQDSNGENKIKMLSGGSPKKKRKV  
\*

ABE-GGGGS<sub>7</sub>-UGI

MSEVEFSHEYWMRHALTLAKRAWDEREVPVGAVLVHNNRVIGEGWNRPIGRHDPTAHAEIMA  
LRQGGGLVMQNYRLIDATLYVTLEPCVMCAGAMIHSRIGRVVFGARDAKTGAAGSLMDVLHHPG  
MNRHVEITEGILADECAALLSDFFRMRRQEIKAQKKAQSSTDSSGSSGGSSGSETPGTSESAT

PESSGGSSGSSSEVEFSHEYWMRHALTLAKRARDEREVPVGAVLVLNNRVIGEGWNRAIGLH  
DPTAHAEIMALRQGGLVMQNYRLIDATLYVTFEPCVMCAGAMIHSRIGRVVFGVRNAKTGAAG  
SLMDVLHYPGMNHRVEITEGILADECAALLCYFFRMPRQVFNAQKKAQSSTDASGGGGSSGGG  
GSGGGSSGGGGSSGGGGSSGGGGSSGGGGSGTDDKKYSIGLAIGTNSVGWAVITDEYKVPSKFKF  
VLGNTDRHSIKKNLIGALLFDSGETAEATRLKRTARRRYTRRKNRICYLQEIFSNEMAKVDDSSFF  
HRLEESFLVEEDKKHERHPIFGNIVDEVAYHEKYPTIYHLRKKLVDSTDKADLRLIYLALAHMIKF  
RGHFLIEGDLNPDNSDVKLFIQLVQTYNQLFEENPINASGVDAKAILSARLSKSRLENLIAQLP  
GEKKNGLFGNLIASLGLTPNFKSNFDLAEDAQLQLSKDQYADLFLAAKNLSDAILLSDILRVNTEITKAPLSASMIKRYDEHHQDLTLLKALVRQQLPEKYKEIFFDQSKNGYAG  
YIDGGASQEEFYKFIKPILEKMDGTEELLVKLNREDLLRKQRTFDNGSIPHQIHLGELHAILRRQE  
DFYFPLKDNREKIEKILTFRIPYYVGPLARGNSRFAWMTRKSEETITPWNFEEVVDKGASAQSF  
ERMTNFDKNLPNEKVLPKHSLLYEYFTVYNELTKVKYVTEGMRKPAFLSGEQKKAIVDLLFKTN  
RKVTVKQLKEDYFKKIECFDSVEISGVEDRFNASLGTYHDLLKIIKDKDFLDNEENEDILEDIVLTL  
TLFEDREMIEERLKYAHLFDDKVMKQLKRRRYTGWGRLSRKLINGIRDKQSGKTILDFLKSDG  
FANRNFMLIHDDSLTFKEDIQKAQVSGQDLSLHEHIANLAGSPAIKKILQTVKVVDELVKVM  
GRHKPENIVIEMARENQTTQKGQKNSRERMKRIEELGKELGSQILKEHPVENTQLQNEKLYLY  
LQNGRDMYVDQELDINRLSDYDVIDHVPQSFLKDDSIDNKVLTRSDKNRGKSDNVPSEEVVK  
MKNYWRQLLNAKLITQRKFDNLTKAERGGLSELDKAGFIKRQLVETRQITKHVAQILDSRMNTK  
YDENDKLIREVKVITLKSCLVSDFRKDFQFYKREINNYHHAHDAYLNAVVGTAALIKKYPKLESEF  
VYGDYKVYDVRKMIKSEQEIGKATAKYFFYSNIMNFFKTEITLANGEIRKRPLIETNGETGEIVW  
DKGRDFATVRKVLSPQVNIVKTEVQTGGFSKESILPKRNSDKLIARKKDWDPKKGFFDSP  
TVAYSVLVAKVEKKGSKKLSVKELLGITIMERSSEFKNPIDFLEAKGYKEVKKDLIILPKYSLF  
ELENGRKRMLASAGELQKGNELALPSKYVNFYLYASHYEKLGSPEDNEQKQLFVEQHKHYLD  
EIIQISEFSKRVLADANLDKVL SAYNKHRDKPIREQAENIIHLFTLTNLGAPAAFKYFDTTIDRKR  
YTSTKEVLDATLIHQSI TGLYETRIDLSQLGGDSRADSGGSTNLSDIEKETGKQLVIQESILMLPE  
EVEEVIGNKPESDILVHTAYDESTDENVMLLTSDAPEYKPWALVIQDSNGENKIKMLSGGSPPK  
KRKV\*

N-ABE

MSEVEFSHEYWMRHALTLAKRAWDEREVPVGAVLVHNNRVIGEGWNRPIGRHDPTAHAEIMA  
LRQGGLVMQNYRLIDATLYVTLEPCVMCAGAMIHSRIGRVVFGARDAKTGAAGSLMDVLHHPG  
MNHRVEITEGILADECAALLSDFFRMRRQEIKAKKKAQSSTDSSGSSGGSSGSETPGTSESAT  
PESSGGSSGSSSEVEFSHEYWMRHALTLAKRARDEREVPVGAVLVLNNRVIGEGWNRAIGLH  
DPTAHAEIMALRQGGLVMQNYRLIDATLYVTFEPCVMCAGAMIHSRIGRVVFGVRNAKTGAAG  
SLMDVLHYPGMNHRVEITEGILADECAALLCYFFRMPRQVFNAQKKAQSSTDSSGSSGGSSG  
SETPGTSESATPESSGGSSGSSDDKKYSIGLAIGTNSVGWAVITDEYKVPSKFKFVLGNTDRHSI  
KKNLIGALLFDSGETAEATRLKRTARRRYTRRKNRICYLQEIFSNEMAKVDDSSFFHRLEESFLVE  
EDKKHERHPIFGNIVDEVAYHEKYPTIYHLRKKLVDSTDKADLRLIYLALAHMIKFRGHFLIEGDL  
NPDNSDVKLFIQLVQTYNQLFEENPINASGVDAKAILSARLSKSRLENLIAQLPGEKKNGLFG  
NLIASLGLTPNFKSNFDLAEDAQLQLSKDQYADLFLAAKNLSDAILLSDILRVNTEITKAPLSASMIKRYDEHHQDLTLLKALVRQQLPEKYKEIFFDQSKNGYAGYIDGGASQE  
EFYKFIKPILEKMDGTEELLVKLNREDLLRKQRTFDNGSIPHQIHLGELHAILRRQEDFYFPLKDN  
REKIEKILTFRIPYYVGPLARGNSRFAWMTRKSEETITPWNFEEVVDKGASAQSFIERMTNFDK  
NLPNEKVLPKHSLLYEYFTVYNELTKVKYVTEGMRKPAFLSGEQKKAIVDLLFKTNRKVTVKQL  
KEDYFKKIECFDSVEISGVEDRFNASLGTYHDLLKIIKDKDFLDNEENEDILEDIVLTLTLFEDREM  
IEERLKYAHLFDDKVMKQLKRRRYTGWGRLSRKLINGIRDKQSGKTILDFLKSDGFANRNFMLQ  
LIHDDSLTFKEDIQKAQVCLAGDTLITLADGRRVPIRELVSQNFVWALNPQTYRLERARVSR  
A  
FCTGIKPVYRLTTRLGRSIRATANHRFLT PQGWKRVDLQPGDYALPRRIPTAS\*

C-ABE

MAAACPELRQLAQSDVYWDPIVSIEPDGVVEEVDLTVPGPHNFVANDIIAHNSGQGDSLHEHIANLAGSPAIKKILQTVKVVDELVKVMGRHHPENIVIAMARENQTTQKGQKNSRERMKRIEEGIKELGSQILKEHPVENTQLQNEKLYLYLQNGRDMYVDQELDINRLSDYDVDHIVPQSFLKDDSIDNKVLTRSDKNRKGSDNVPSEEVVKMKNYWRQLLNAKLITQRKFDNLTKAERGGELSELDKAGFIKRQLVETRQITKHVAQILD SRMNTKYDENDKLIREVKVITLKS KLVSDFRKDFQFYK VREINNYHHAHDAYLNAVVG TALIKKYPKLESEFVYGDYKVYDVRKMIAKSEQEIGKATAKYFFYSNIMNFFKTEITLANGEIRKRPLIETNGETGEIVWDKGRDFATVRKVL SMPQVNIVKKTEVQTGGFSKESILPKRNSDKLIARKKDWDPK KYGGFDSPTVAYSVLV VAKVEKGKSKKLKSVKELLGITIMERS SFEKNPIDFLEAKGYKEVKKDLIIKLPKYSLFELENGRKRMLASAGELQKGNELALPSKYVNFLYLASHYEKLGSPEDNEQKQLFVEQHKHYLDEIIEQISEFSKRVILADANLDKVL SAYNKHRDKPIREQAENIIHLFTLTNLGAPAAFKYFDTTIDRKRYTSTKEVL DATLIHQ SITGLYETRIDLSQLGGDSRADPKKKRKV\*

N-ABE-AAV

MSEVEFSHEYWMRHALTLAKRAWDEREVPVGAVLVHNNRVIGEGWNRPIGRHDPTAHAEIMALRQGGGLVMQNYRLIDATLYVTLEPCVMCAGAMIHSRIGRVVFGARDAKTGAAGSLMDVLHHPGMNHRVEITEGILADECAALLSDFFRMRRQEIKAKKKAQSSTD SGGSSGGSSGSETPGTSESATPESSGGSSGSSSEVEFSHEYWMRHALTLAKRARDEREVPVGAVLVLNNRVIGEGWNRRAIGLHDPTAHAEIMALRQGGGLVMQNYRLIDATLYVTFEPCVMCAGAMIHSRIGRVVFGVRNAKTGAAGSLMDVLHYPGMNHRVEITEGILADECAALLCYFFRMPRQVFNAQKKAQSSTDASGGGGSSGGGGSSGGGGSSGGGGSSGGGGSGTDDKKYSIGLAIGTNSVGWAVITDEYKVPSKKFKVLGNTDRHSIKKNLIGALLFDSGETAEATRLKRTARRRYTRRKNRICYLQEIFSNEMAKVDDSFHRLEESFLVEEDKKHERHPIFGNIVDEVAYHEKYPTIYHLRKKLVDSTDKADLRLIYLALAHMIKFRGHFLIEGDLNPDNSDVKLFIQLVQTYNQLFEENPINASGVDAKAILSARLSKSRLENLIAQLPGEKKNGLFGNLIALLSLGLTPNFKSNFDLAEDAKLQLSKDTYDDDLDNLLAQIGDQYADLFLAAKNLSDAILLSDILRVNTEITKAPLSASMIKRYDEHHQDLTLLKALVRQQLPEKYKEIFFDQSKNGYAGYIDGGASQEEFYKFIKPILEKMDGTEELLVKNREDLLRKQRTFDNGSIPHQIHLGELHAILRRQEDFY PFLKDNREKIEKILTRIPYYVGPLARGNSRFAWMTRKSEETITPWNFEVVDK GASAQSFIERMTNFDKNLPNEKVLPHKSHLLYEYFTVYNELTKVKYVTEGMRKPAFLSGEQKKAIVDLLFKTNRKVTVKQLKEDYFKKIECFDSVEISGVEDRFNASLGTYHDLLKIIKDKDFLDNEENEDILEDIVLTLTLFEDREMIEERLKYTAHLFDDKVMKQLKRRRYTGWGRLSRKLINGIRDKQSGKTILDFLKSDGFANRNFMQLIHDDSLTFKEDIKKAQVCLAGDTLITLADGRRVPIRELVSQNFVWALNPQTYRLERARVSR AFC TGIKPVYRLTTRLGRSIRATANHRFLTPQG WKRVDELQPGDY LALPRRIPTAS\*

C-ABE-AAV

MAAACPELRQLAQSDVYWDPIVSIEPDGVVEEVDLTVPGPHNFVANDIIAHNSGQGDSLHEHIANLAGSPAIKKILQTVKVVDELVKVMGRHHPENIVIAMARENQTTQKGQKNSRERMKRIEEGIKELGSQILKEHPVENTQLQNEKLYLYLQNGRDMYVDQELDINRLSDYDVDHIVPQSFLKDDSIDNKVLTRSDKNRKGSDNVPSEEVVKMKNYWRQLLNAKLITQRKFDNLTKAERGGELSELDKAGFIKRQLVETRQITKHVAQILD SRMNTKYDENDKLIREVKVITLKS KLVSDFRKDFQFYK VREINNYHHAHDAYLNAVVG TALIKKYPKLESEFVYGDYKVYDVRKMIAKSEQEIGKATAKYFFYSNIMNFFKTEITLANGEIRKRPLIETNGETGEIVWDKGRDFATVRKVL SMPQVNIVKKTEVQTGGFSKESILPKRNSDKLIARKKDWDPK KYGGFDSPTVAYSVLV VAKVEKGKSKKLKSVKELLGITIMERS SFEKNPIDFLEAKGYKEVKKDLIIKLPKYSLFELENGRKRMLASAGELQKGNELALPSKYVNFLYLASHYEKLGSPEDNEQKQLFVEQHKHYLDEIIEQISEFSKRVILADANLDKVL SAYNKHRDKPIREQAENIIHLFTLTNLGAPAAFKYFDTTIDRKRYTSTKEVL DATLIHQ SITGLYETRIDLSQLGGDSGGST

NLSDIIEKETGKQLVIQESILMLPEEVEEVIGNKPESDILVHTAYDESTDENVMLLTSDAPEYKPW  
ALVIQDSNGENKIKMLSYPYDVPDYAYPYDVPDYAYPYDVPDYASGGSPKKRKY\*

## References

- 1 Hsu, P. D. *et al.* DNA targeting specificity of RNA-guided Cas9 nucleases. *Nat Biotechnol* **31**, 827-832, doi:10.1038/nbt.2647 (2013).
- 2 Doench, J. G. *et al.* Optimized sgRNA design to maximize activity and minimize off-target effects of CRISPR-Cas9. *Nat Biotechnol* **34**, 184-191, doi:10.1038/nbt.3437 (2016).
